# Supplementary material
Source: publisher site journal article supplement (https://www.dovepress.com/article/316963)
Supplement: Supplementary file 1 [file get_supplementary_file.php]

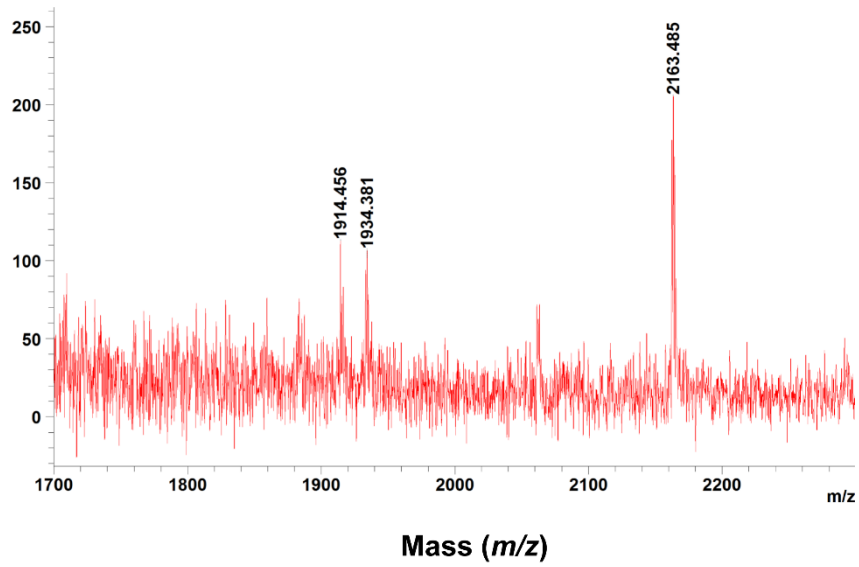

Figure S1. Representative mass spectra of *E. coli* ATCC25922-R lipid A extracted by the method discussed above using Negative ion MALDI-TOF. Lipid A from colistin-resistant *E. coli* ATCC25922-R is modified by pETN and L-Ara4N which are detected as additional peaks at  $m/z$ 1914.5,  $m/z$  1934.4 and  $m/z$  2164.5.

**Supplementary Table S1. RT-PCR primers used in this study.**

| <b>Primers</b> | <b>Sequences</b>      | <b>Product</b> | <b>Source</b>       |
|----------------|-----------------------|----------------|---------------------|
| <i>pmrB</i> -F | CCTTTTGCCTGGAAGAGT    | 158 bp         | Luo et al.,<br>2019 |
| <i>pmrB</i> -R | TCTTTGGGCGTCAGAATCAAC |                |                     |
| <i>relA</i> -F | ATGCCAACGTAGTCAGCGAA  | 166 bp         | This study          |
| <i>relA</i> -R | GCCAATAACATCCGGCGAAC  |                |                     |
| <i>evgS</i> -F | TTAACACTCCGGGAATACGC  | 152 bp         | This study          |
| <i>evgS</i> -R | GCGCCGGAAAGGTAATTATC  |                |                     |
| <i>evgA</i> -F | CTTGCTATCGCAGCAATTCGT | 156 bp         | This study          |
| <i>evgA</i> -R | CTGGATACCGTTAACTCCGG  |                |                     |

Supplementary Table S2. The different expression of genes in sample B vs. sample A through transcriptome

| GeneID      | Annotation                                                            | length | B_25992- | B_25992- | B_25992- | A_25992  | A_25992  | A_25992  | logCPM     | log2Ratio(B/A) | Up-Down-Regulation | P-value   | FDR      |
|-------------|-----------------------------------------------------------------------|--------|----------|----------|----------|----------|----------|----------|------------|----------------|--------------------|-----------|----------|
|             |                                                                       |        | _1_reads | _2_reads | _3_reads | _1_reads | _2_reads | _3_reads |            |                |                    |           |          |
|             |                                                                       | Count  | Count    | Count    | Count    | Count    | Count    | Count    |            |                |                    |           |          |
| D1792_03865 | cold-shock protein CspB                                               | 216    | 0        | 0        | 0        | 16       | 11       | 6        | 0.1507137  | -6.660978502   | down               | 4.10E-07  | 6.02E-05 |
| D1792_01810 | regulatory protein AriR                                               | 267    | 0        | 0        | 0        | 10       | 4        | 13       | 0.0049062  | -6.555259071   | down               | 5.83E-06  | 0.000501 |
| D1792_27505 | hypothetical protein                                                  | 324    | 0        | 1.33     | 0        | 14       | 29.67    | 21       | 1.030965   | -5.685092327   | down               | 3.66E-09  | 1.39E-06 |
| D1792_27680 | hypothetical protein                                                  | 324    | 0        | 1.33     | 0        | 14       | 29.67    | 21       | 1.030965   | -5.685080415   | down               | 3.64E-09  | 1.39E-06 |
| D1792_27330 | hypothetical protein                                                  | 324    | 0        | 1.33     | 0        | 14       | 29.67    | 21       | 1.030965   | -5.685051395   | down               | 3.58E-09  | 1.39E-06 |
| D1792_03840 | cold-shock protein CspI                                               | 213    | 0        | 1        | 0        | 5        | 10       | 11       | -0.0130668 | -4.720505765   | down               | 4.20E-05  | 0.00222  |
| D1792_00865 | multiple stress resistance protein                                    | 258    | 14       | 10       | 18       | 166      | 256      | 258      | 4.4283933  | -4.496639934   | down               | 3.09E-15  | 7.03E-12 |
| D1792_12355 | protein GlcG                                                          | 405    | 228      | 311      | 302      | 2062     | 5230     | 5486     | 8.7108938  | -4.462864671   | down               | 7.95E-15  | 1.21E-11 |
| D1792_27500 | hypothetical protein                                                  | 246    | 1        | 3        | 0        | 23.5     | 17.5     | 23       | 1.0714848  | -4.369175762   | down               | 6.31E-08  | 1.10E-05 |
| D1792_27685 | hypothetical protein                                                  | 246    | 1        | 3        | 0        | 23.5     | 17.5     | 23       | 1.0714848  | -4.369155817   | down               | 6.27E-08  | 1.10E-05 |
| tnaA        | tryptophanase                                                         | 1416   | 19560    | 28861    | 35792    | 127180   | 334270   | 353336   | 14.746872  | -3.78579198    | down               | 5.93E-10  | 3.00E-07 |
| D1792_15610 | cold-shock protein                                                    | 213    | 16       | 27       | 21       | 131      | 269      | 214      | 4.2992657  | -3.734137124   | down               | 5.81E-12  | 6.62E-09 |
| D1792_11760 | MarR family transcriptional regulator                                 | 552    | 16.64    | 238.9    | 22.06    | 454.64   | 962.5    | 916.54   | 6.2710756  | -3.652801412   | down               | 7.31E-06  | 0.000584 |
| D1792_01505 | hypothetical protein                                                  | 558    | 16       | 81       | 1        | 246      | 317      | 244      | 4.6651663  | -3.57355106    | down               | 1.74E-05  | 0.001134 |
| glcB        | malate synthase                                                       | 2172   | 4130     | 4225     | 3283     | 18542    | 35641    | 38394    | 11.609078  | -3.556757764   | down               | 1.26E-11  | 1.10E-08 |
| D1792_24740 | succinyl-CoA ligase subunit alpha                                     | 870    | 2769     | 4156     | 4552     | 13212    | 32551    | 35914    | 11.466511  | -3.359325595   | down               | 1.02E-08  | 2.72E-06 |
| D1792_24735 | succinyl-CoA ligase subunit beta                                      | 1167   | 3694     | 5687     | 5910     | 13651    | 44955    | 47922    | 11.860376  | -3.341445638   | down               | 5.95E-08  | 1.10E-05 |
| D1792_00130 | hypothetical protein                                                  | 459    | 0.5      | 4.5      | 0        | 25       | 9        | 6.5      | 0.4929614  | -3.274863744   | down               | 0.0001556 | 0.005963 |
| D1792_26560 | hypothetical protein                                                  | 459    | 0.5      | 4.5      | 0        | 25       | 9        | 6.5      | 0.4929614  | -3.274862263   | down               | 0.0001562 | 0.005963 |
| D1792_12370 | glycolate oxidase                                                     | 1500   | 1991     | 2458     | 1577     | 8327     | 13632    | 14791    | 10.299841  | -3.167017587   | down               | 2.02E-10  | 1.15E-07 |
| D1792_11780 | fimbrial protein<br>dihydrolypoyllysine-residue                       | 528    | 22       | 38       | 3        | 66       | 129      | 146      | 3.5698931  | -3.076139233   | down               | 1.64E-05  | 0.00111  |
| D1792_24730 | succinyltransferase component of 2-oxoglutarate dehydrogenase complex | 1218   | 5983     | 9904     | 10698    | 29290    | 60492    | 66030    | 12.413649  | -3.061186287   | down               | 6.00E-08  | 1.10E-05 |
| D1792_05400 | DNA polymerase III subunit theta                                      | 231    | 8        | 3        | 6        | 13       | 48       | 36       | 1.7530565  | -2.990438963   | down               | 2.39E-05  | 0.00138  |
| D1792_16520 | low affinity tryptophan permease                                      | 1248   | 2308     | 2534     | 2834     | 7402     | 17040    | 17674    | 10.531273  | -2.984997077   | down               | 3.13E-08  | 6.78E-06 |
| D1792_13860 | acetyl-CoA carboxylase                                                | 189    | 1        | 2        | 3        | 12       | 12       | 12       | 0.453314   | -2.931250618   | down               | 0.0001571 | 0.005963 |
| D1792_06480 | colibactin biosynthesis<br>phosphopantetheinyl transferase ClbA       | 735    | 4        | 32       | 20       | 114      | 48       | 135      | 3.4043755  | -2.930117724   | down               | 9.89E-05  | 0.004288 |
| D1792_03830 | hypothetical protein                                                  | 273    | 2        | 0        | 4        | 6        | 7        | 19       | 0.4014804  | -2.918806684   | down               | 0.0015672 | 0.0305   |
| D1792_04090 | multidrug transporter subunit MdtJ                                    | 366    | 101      | 124      | 167      | 275      | 948      | 860      | 6.1958035  | -2.907345304   | down               | 8.61E-08  | 1.45E-05 |
| D1792_24720 | succinate dehydrogenase iron-sulfur subunit                           | 717    | 1990     | 2980     | 3147     | 7957     | 14962    | 15489    | 10.413148  | -2.742794998   | down               | 1.82E-07  | 2.86E-05 |
| D1792_24245 | cold-shock protein CspE                                               | 210    | 412      | 877      | 849      | 2576     | 3970     | 3754     | 8.4824279  | -2.724251886   | down               | 3.81E-08  | 7.88E-06 |
| D1792_12360 | glycolate oxidase iron-sulfur subunit                                 | 1224   | 1466     | 1821     | 1053     | 4361     | 6986     | 6956     | 9.3392855  | -2.623629572   | down               | 1.36E-08  | 3.26E-06 |
| oppA        | oligooetide transporter subunit                                       | 1632   | 6848     | 9643     | 12780    | 25089    | 47453    | 54447    | 12.176787  | -2.61975629    | down               | 2.50E-06  | 0.000271 |
| D1792_11810 | type 1 fimbrial protein                                               | 567    | 456      | 731      | 612      | 992      | 3420     | 3168     | 8.1036511  | -2.607845007   | down               | 1.32E-06  | 0.000162 |
| D1792_24725 | 2-oxoglutarate dehydrogenase subunit E1                               | 2802   | 9924     | 13856    | 15148    | 27990    | 62830    | 72249    | 12.552501  | -2.60193248    | down               | 3.26E-06  | 0.000319 |
| D1792_11825 | hypothetical protein                                                  | 288    | 0        | 8        | 7        | 7        | 32       | 28       | 1.326238   | -2.601475328   | down               | 0.0022469 | 0.039205 |
| marB        | hypothetical protein                                                  | 219    | 1        | 3        | 3        | 11       | 16       | 7        | 0.3875292  | -2.569349068   | down               | 0.0008943 | 0.022013 |
| D1792_27750 | GNAT family N-acetyltransferase                                       | 1770   | 181      | 386      | 42.5     | 496      | 877.5    | 873.5    | 6.338345   | -2.497253424   | down               | 1.96E-05  | 0.001221 |
| D1792_27435 | hypothetical protein                                                  | 1770   | 181      | 386      | 42.5     | 496      | 877.5    | 873.5    | 6.338345   | -2.497253077   | down               | 1.96E-05  | 0.001221 |
| D1792_27745 | class I SAM-dependent methyltransferase                               | 804    | 19.5     | 92       | 33       | 112      | 249      | 211      | 4.347658   | -2.495486177   | down               | 5.34E-05  | 0.002641 |
| D1792_27440 | class I SAM-dependent methyltransferase                               | 804    | 19.5     | 92       | 33       | 112      | 249      | 211      | 4.347658   | -2.495485206   | down               | 5.32E-05  | 0.002641 |
| glcE        | glycolate oxidase FAD binding                                         | 1053   | 1392     | 1565     | 850      | 3369     | 5223     | 5421     | 8.9861602  | -2.444458201   | down               | 9.04E-08  | 1.47E-05 |

|             |                                                                                                            |      |       |       |       |       |       |       |           |              |      |           |          |
|-------------|------------------------------------------------------------------------------------------------------------|------|-------|-------|-------|-------|-------|-------|-----------|--------------|------|-----------|----------|
| D1792_26150 | trifunctional transcriptional regulator/proline dehydrogenase/L-glutamate gamma-semialdehyde dehydrogenase | 3963 | 7637  | 10585 | 8519  | 18732 | 39300 | 39400 | 11.80711  | -2.39834326  | down | 2.79E-06  | 0.000295 |
| D1792_01500 | DUF1828 domain-containing protein                                                                          | 753  | 148   | 353   | 101   | 474   | 728   | 861   | 6.2588029 | -2.369855743 | down | 1.89E-06  | 0.000221 |
| D1792_25425 | arginine/ornithine ABC transporter substrate-binding protein                                               | 732  | 434   | 352   | 341   | 1121  | 1604  | 1401  | 7.1927941 | -2.365779225 | down | 1.45E-11  | 1.10E-08 |
| D1792_02760 | 2-Cys peroxiredoxin                                                                                        | 507  | 1521  | 2500  | 3145  | 6610  | 9261  | 10374 | 9.9149203 | -2.342407206 | down | 6.56E-06  | 0.000537 |
| D1792_06980 | glycosyltransferase family 2 protein                                                                       | 861  | 27    | 131   | 16    | 131   | 229   | 226   | 4.4224023 | -2.329794031 | down | 0.0006134 | 0.016629 |
| D1792_24695 | hypothetical protein                                                                                       | 186  | 74    | 102   | 124   | 157   | 445   | 452   | 5.3071886 | -2.325671303 | down | 1.84E-05  | 0.00118  |
| D1792_25530 | cold-shock protein CspD                                                                                    | 225  | 49    | 123   | 71    | 92    | 326   | 373   | 4.9331076 | -2.287849884 | down | 0.000191  | 0.006674 |
| D1792_24715 | succinate dehydrogenase flavoprotein subunit                                                               | 1767 | 6107  | 9321  | 9591  | 16046 | 32892 | 34902 | 11.623824 | -2.257847242 | down | 2.20E-05  | 0.001321 |
| D1792_13770 | DUF1471 domain-containing protein                                                                          | 264  | 23    | 29    | 20    | 64    | 107   | 77    | 3.1430304 | -2.241377626 | down | 5.98E-06  | 0.000504 |
| D1792_24700 | hypothetical protein                                                                                       | 240  | 22    | 53    | 34    | 79    | 144   | 140   | 3.7483694 | -2.236830106 | down | 6.74E-05  | 0.003101 |
| D1792_04160 | fumarate hydratase class I%2C                                                                              | 1647 | 6501  | 9305  | 11458 | 14682 | 35232 | 38280 | 11.721019 | -2.207856692 | down | 8.13E-05  | 0.003558 |
| D1792_05890 | multidrug SMR transporter                                                                                  | 333  | 5     | 5     | 11    | 21    | 18    | 31    | 1.461303  | -2.206525103 | down | 0.0013659 | 0.02802  |
| D1792_24690 | type II citrate synthase                                                                                   | 1284 | 8301  | 12197 | 16011 | 21008 | 44259 | 51462 | 12.134408 | -2.188320989 | down | 0.0001009 | 0.004335 |
| D1792_20880 | 30S ribosomal protein S20                                                                                  | 264  | 35    | 42    | 30    | 124   | 111   | 115   | 3.6583156 | -2.183734471 | down | 2.34E-06  | 0.000259 |
| D1792_25170 | amino acid ABC transporter substrate-binding protein                                                       | 747  | 2564  | 3574  | 3982  | 5897  | 13205 | 13173 | 10.25409  | -2.177086629 | down | 3.59E-05  | 0.001993 |
| phoH        | conserved protein with nucleoside triphosphate hydrolase domain                                            | 924  | 2169  | 3701  | 3556  | 7232  | 11621 | 11354 | 10.133261 | -2.158328413 | down | 1.24E-05  | 0.000885 |
| D1792_05250 | hypothetical protein                                                                                       | 210  | 17    | 11    | 2     | 13    | 45    | 32    | 1.7683317 | -2.149883129 | down | 0.0016607 | 0.031512 |
| D1792_13760 | malate dehydrogenase                                                                                       | 939  | 6032  | 9749  | 10587 | 16003 | 32025 | 33777 | 11.607444 | -2.134925344 | down | 6.55E-05  | 0.003045 |
| D1792_06960 | glycosyltransferase                                                                                        | 1206 | 10    | 35    | 14    | 56    | 34    | 82    | 2.7587856 | -2.129115557 | down | 0.0015125 | 0.02969  |
| D1792_08745 | DNA-binding response regulator                                                                             | 615  | 192   | 243   | 210   | 545   | 786   | 691   | 6.2083269 | -2.12329026  | down | 1.87E-08  | 4.26E-06 |
| D1792_05655 | flagellar transcriptional activator FlhD                                                                   | 351  | 225   | 245   | 416   | 526   | 1134  | 1117  | 6.7202035 | -2.11912139  | down | 1.23E-05  | 0.000885 |
| D1792_23380 | cytochrome bo(3) ubiquinol oxidase subunit 3                                                               | 615  | 1257  | 1418  | 1745  | 2692  | 5151  | 5599  | 9.0078412 | -2.118800412 | down | 2.29E-05  | 0.001352 |
| ygeW        | hypothetical protein                                                                                       | 1191 | 2026  | 2042  | 2426  | 3777  | 7568  | 8045  | 9.5382307 | -2.10260788  | down | 2.65E-05  | 0.001508 |
| D1792_24375 | glutamate/aspartate ABC transporter substrate-binding protein                                              | 909  | 2810  | 3811  | 4120  | 7819  | 11526 | 12749 | 10.25417  | -2.077434952 | down | 2.34E-05  | 0.001367 |
| D1792_25370 | DUF1418 family protein                                                                                     | 288  | 67    | 66    | 42    | 93    | 208   | 198   | 4.2467908 | -2.071500663 | down | 5.13E-05  | 0.002597 |
| D1792_23375 | cytochrome o ubiquinol oxidase subunit IV                                                                  | 330  | 138   | 128   | 154   | 244   | 479   | 499   | 5.5508444 | -2.062439449 | down | 9.28E-06  | 0.000716 |
| D1792_00210 | MarR family transcriptional regulator                                                                      | 552  | 9.36  | 67.1  | 13.94 | 64.36 | 98.5  | 97.46 | 3.2959959 | -2.057698575 | down | 0.0029087 | 0.047608 |
| D1792_01920 | hypothetical protein                                                                                       | 294  | 116   | 123   | 153   | 278   | 427   | 446   | 5.4499972 | -2.044667827 | down | 4.95E-06  | 0.000433 |
| D1792_21430 | aconitate hydratase B                                                                                      | 2598 | 18168 | 29484 | 32919 | 51244 | 86170 | 97536 | 13.148363 | -2.04401684  | down | 0.0001096 | 0.004579 |
| D1792_11815 | major pilus subunit operon regulatory protein PapB                                                         | 315  | 31    | 31    | 25    | 53    | 86    | 97    | 3.1971941 | -1.982435091 | down | 0.000205  | 0.006914 |
| D1792_20275 | ClbS/DfsB family four-helix bundle protein                                                                 | 519  | 27    | 64.5  | 17.5  | 73.5  | 95    | 119   | 3.4835831 | -1.97813678  | down | 0.0007278 | 0.019049 |
| D1792_06840 | hypothetical protein                                                                                       | 519  | 27    | 64.5  | 17.5  | 73.5  | 95    | 119   | 3.4835831 | -1.978130535 | down | 0.0007256 | 0.019049 |
| D1792_25300 | biofilm regulator BssR                                                                                     | 384  | 176   | 232   | 127   | 293   | 542   | 578   | 5.7790295 | -1.970758497 | down | 8.45E-06  | 0.000664 |
| D1792_22835 | transcriptional regulator                                                                                  | 588  | 1708  | 2706  | 2609  | 4504  | 7282  | 7672  | 9.5514606 | -1.968217991 | down | 5.54E-05  | 0.002686 |
| D1792_12935 | 30S ribosomal protein S21                                                                                  | 216  | 110   | 289   | 359   | 713   | 756   | 732   | 6.3599691 | -1.931093588 | down | 4.85E-05  | 0.002482 |
| D1792_15995 | 50S ribosomal protein L28                                                                                  | 237  | 34    | 63    | 26    | 77    | 117   | 126   | 3.6329708 | -1.928315502 | down | 0.0003336 | 0.010698 |
| D1792_01470 | lambda prophage-derived protein ea10                                                                       | 369  | 54    | 73    | 56    | 96    | 196   | 189   | 4.2225483 | -1.916688922 | down | 0.0001637 | 0.006112 |
| D1792_20075 | DNA cytosine methyltransferase                                                                             | 1191 | 74    | 174   | 50    | 177   | 302   | 285   | 4.8742141 | -1.910064524 | down | 0.0001832 | 0.006568 |
| D1792_10280 | mRNA interferase HigB                                                                                      | 312  | 29    | 22    | 18    | 45    | 59    | 72    | 2.792575  | -1.901461053 | down | 0.0004173 | 0.012475 |
| D1792_05055 | DUF1315 family protein                                                                                     | 273  | 43    | 83    | 133   | 104   | 307   | 291   | 4.7912847 | -1.893709145 | down | 0.0018933 | 0.034498 |
| D1792_16695 | asparagine synthetase A                                                                                    | 993  | 2058  | 2667  | 1980  | 2983  | 6717  | 7163  | 9.3874794 | -1.892677803 | down | 0.0001487 | 0.00589  |

|             |                                                                                  |      |       |       |       |       |       |       |           |              |      |           |          |
|-------------|----------------------------------------------------------------------------------|------|-------|-------|-------|-------|-------|-------|-----------|--------------|------|-----------|----------|
| acnA        | aconitate hydratase                                                              | 2676 | 3794  | 4084  | 3735  | 6621  | 11849 | 11561 | 10.185862 | -1.890807231 | down | 5.67E-05  | 0.002707 |
| D1792_12250 | nucleotidyl transferase AbiEii/AbiGii                                            | 918  | 315   | 447   | 298   | 640   | 1067  | 1026  | 6.7197493 | -1.887911603 | down | 1.46E-06  | 0.000175 |
| D1792_23370 | toxin family protein                                                             | 891  | 1318  | 1636  | 1472  | 2340  | 4264  | 4639  | 8.7943252 | -1.880717622 | down | 6.84E-05  | 0.003115 |
| cedA        | protoheme IX farnesyltransferase                                                 | 264  | 29    | 51    | 62    | 70    | 150   | 153   | 3.8793971 | -1.874321207 | down | 0.0013323 | 0.027704 |
| nanR        | cell division modulator                                                          | 735  | 186   | 284   | 193   | 338   | 749   | 618   | 6.0330963 | -1.86710845  | down | 1.16E-05  | 0.000851 |
| D1792_23390 | putative transcriptional regulator                                               | 948  | 5595  | 8202  | 10938 | 13658 | 22587 | 27147 | 11.308024 | -1.856531297 | down | 0.0005408 | 0.015298 |
| D1792_24705 | cytochrome ubiquinol oxidase subunit II                                          | 390  | 344   | 453   | 550   | 800   | 1275  | 1374  | 7.0844059 | -1.845539312 | down | 1.66E-05  | 0.00111  |
| D1792_05720 | succinate dehydrogenase cytochrome b556 subunit                                  | 498  | 707   | 1110  | 892   | 1664  | 2496  | 2659  | 8.0608928 | -1.843766827 | down | 2.20E-05  | 0.001321 |
| D1792_01365 | non-heme ferritin                                                                | 1251 | 15318 | 24545 | 29668 | 30843 | 68564 | 74348 | 12.769879 | -1.825432901 | down | 0.0009596 | 0.022916 |
| D1792_23385 | NADP-dependent isocitrate dehydrogenase                                          | 1992 | 6929  | 9326  | 10835 | 13446 | 25837 | 27834 | 11.388118 | -1.815973137 | down | 0.0004625 | 0.013415 |
| D1792_01485 | cytochrome ubiquinol oxidase subunit I                                           | 582  | 53    | 47    | 19    | 51    | 140   | 97    | 3.4639167 | -1.815969986 | down | 0.0008479 | 0.021273 |
| D1792_16660 | superinfection exclusion protein B                                               | 240  | 33    | 67    | 75    | 108   | 192   | 157   | 4.1324277 | -1.810564095 | down | 0.0006635 | 0.017878 |
| D1792_10070 | ATP synthase subunit C                                                           | 1203 | 1345  | 1072  | 1046  | 3118  | 2623  | 2862  | 8.3537715 | -1.79993163  | down | 3.29E-06  | 0.000319 |
| D1792_01520 | glycine betaine/L-proline ABC transporter ATP-binding protein                    | 297  | 42    | 34    | 27    | 53    | 98    | 95    | 3.2798649 | -1.794049151 | down | 0.0005339 | 0.015197 |
| flhC        | hypothetical protein                                                             | 579  | 611   | 552   | 626   | 1038  | 1681  | 1645  | 7.4177953 | -1.789913754 | down | 3.22E-06  | 0.000319 |
| D1792_02800 | DNA binding transcriptional dual regulator                                       | 258  | 160   | 336   | 292   | 483   | 715   | 740   | 6.2529831 | -1.779667239 | down | 5.77E-05  | 0.002707 |
| ihfB        | DUF2534 family protein                                                           | 285  | 57    | 63    | 31    | 77    | 149   | 130   | 3.797564  | -1.778593713 | down | 0.0003992 | 0.012273 |
| D1792_25680 | integration host factor subunit beta                                             | 1674 | 6047  | 8361  | 10409 | 11270 | 22370 | 25698 | 11.236001 | -1.771555787 | down | 0.0009611 | 0.022916 |
| D1792_22825 | 30S ribosomal protein S1                                                         | 1671 | 5097  | 6863  | 6793  | 9048  | 16982 | 17776 | 10.782125 | -1.739564858 | down | 0.0004881 | 0.014068 |
| proX        | oxygen-dependent choline dehydrogenase                                           | 993  | 1339  | 1313  | 1171  | 2291  | 3113  | 3371  | 8.446002  | -1.726040552 | down | 4.24E-05  | 0.00222  |
| D1792_17945 | glycine betaine transporter subunit Si-specific NAD(P)(+)                        | 1401 | 5545  | 7925  | 8981  | 11898 | 19017 | 21310 | 11.042358 | -1.717696682 | down | 0.0006723 | 0.018009 |
| D1792_07715 | transhydrogenase bifunctional murein DD-endopeptidase/murein LD-carboxypeptidase | 567  | 383   | 286   | 375   | 839   | 862   | 800   | 6.5813092 | -1.711510464 | down | 8.32E-07  | 0.000111 |
| D1792_07350 | type I fimbrial protein                                                          | 543  | 204   | 377   | 164   | 297   | 591   | 719   | 6.0538762 | -1.711448763 | down | 0.0004016 | 0.012273 |
| D1792_26370 | acyl carrier protein                                                             | 252  | 24    | 14    | 6     | 45    | 45    | 19    | 2.006886  | -1.707324863 | down | 0.0013604 | 0.02802  |
| lpdA        | dihydroliipoamide dehydrogenase                                                  | 1424 | 11849 | 17211 | 18856 | 20885 | 42030 | 46344 | 12.124419 | -1.705684176 | down | 0.0011878 | 0.025561 |
| D1792_22830 | betaine-aldehyde dehydrogenase                                                   | 1473 | 5137  | 7699  | 7807  | 11044 | 17630 | 18662 | 10.894346 | -1.693510271 | down | 0.0005757 | 0.015889 |
| D1792_24115 | carbon starvation protein                                                        | 2106 | 4586  | 6610  | 6050  | 7592  | 15174 | 15681 | 10.610304 | -1.677611811 | down | 0.0008324 | 0.021061 |
| D1792_11105 | PLP-dependent lyase/thiolase                                                     | 1197 | 2092  | 2518  | 2316  | 3316  | 5784  | 6163  | 9.2759026 | -1.667995938 | down | 0.0003708 | 0.011726 |
| D1792_04085 | spermidine export protein MdtI                                                   | 330  | 87    | 77    | 43    | 108   | 141   | 183   | 4.1498695 | -1.657873113 | down | 0.0008698 | 0.021528 |
| msrB        | methionine sulfoxide reductase B                                                 | 414  | 423   | 475   | 497   | 559   | 1292  | 1220  | 6.9611645 | -1.652665745 | down | 0.0001213 | 0.004978 |
| dnaK        | molecular chaperone                                                              | 1917 | 7326  | 8960  | 9889  | 10220 | 23466 | 23449 | 11.193027 | -1.641390567 | down | 0.0014521 | 0.029131 |
| D1792_27430 | LD-carboxypeptidase                                                              | 1035 | 29    | 75    | 29    | 122   | 98    | 85    | 3.5389161 | -1.63684962  | down | 0.0010592 | 0.024118 |
| D1792_11110 | YgeY family selenium metabolism-linked hydrolase                                 | 1212 | 2138  | 2010  | 2515  | 3511  | 5313  | 5687  | 9.2024552 | -1.62658364  | down | 0.0004143 | 0.012475 |
| D1792_09940 | RnfH family protein                                                              | 291  | 84    | 70    | 75    | 92    | 231   | 174   | 4.3074959 | -1.606443275 | down | 0.0010392 | 0.023915 |
| D1792_01975 | alanine racemase catabolic                                                       | 1071 | 1439  | 1928  | 1791  | 2508  | 4270  | 4271  | 8.8103943 | -1.604168737 | down | 0.0004347 | 0.012853 |
| D1792_01460 | host cell division inhibitory peptide                                            | 270  | 50    | 77    | 43    | 78    | 136   | 140   | 3.8568872 | -1.598621702 | down | 0.0017851 | 0.033453 |
| D1792_09265 | peroxiredoxin                                                                    | 471  | 390   | 423   | 491   | 940   | 917   | 1003  | 6.8297686 | -1.596344203 | down | 1.15E-05  | 0.000851 |
| ygfK        | predicted oxidoreductase                                                         | 3099 | 6158  | 6532  | 6225  | 9131  | 14753 | 15679 | 10.662168 | -1.591299856 | down | 0.0006929 | 0.018454 |
| D1792_01970 | D-amino acid dehydrogenase small subunit                                         | 1299 | 2551  | 3625  | 3317  | 4077  | 8114  | 7780  | 9.6736663 | -1.579038248 | down | 0.0010743 | 0.024142 |
| D1792_08985 | phosphocarrier protein HPr                                                       | 258  | 53    | 89    | 76    | 97    | 189   | 176   | 4.235044  | -1.574714424 | down | 0.0020419 | 0.036324 |

|             |                                                             |      |       |       |       |       |       |       |           |              |      |           |          |
|-------------|-------------------------------------------------------------|------|-------|-------|-------|-------|-------|-------|-----------|--------------|------|-----------|----------|
| D1792_10985 | RNA pyrophosphohydrolase                                    | 531  | 1067  | 1445  | 1327  | 1391  | 3270  | 3226  | 8.3540358 | -1.564360911 | down | 0.0011899 | 0.025561 |
| D1792_01490 | antitermination protein N                                   | 273  | 40    | 51    | 54    | 83    | 115   | 112   | 3.6482105 | -1.563806491 | down | 0.0016303 | 0.031193 |
| D1792_24710 | succinate dehydrogenase hydrophobic membrane anchor subunit | 348  | 161   | 253   | 150   | 264   | 522   | 400   | 5.5590215 | -1.563498471 | down | 0.0001885 | 0.006674 |
| D1792_22555 | sigma factor-binding protein Crl                            | 402  | 1178  | 1815  | 1729  | 2204  | 3676  | 3892  | 8.6559976 | -1.553481514 | down | 0.0009288 | 0.02262  |
| D1792_00770 | acyl carrier protein                                        | 237  | 155   | 362   | 313   | 359   | 727   | 665   | 6.1603176 | -1.552759603 | down | 0.0009759 | 0.023027 |
| D1792_00820 | DUF1425 domain-containing protein                           | 378  | 95    | 116   | 106   | 169   | 254   | 240   | 4.7445644 | -1.551714405 | down | 0.0004191 | 0.012475 |
| D1792_24550 | transcriptional repressor                                   | 447  | 734   | 947   | 1074  | 1320  | 2092  | 2290  | 7.8824837 | -1.549593824 | down | 0.0003463 | 0.01103  |
| D1792_09435 | nucleoside-diphosphate kinase                               | 432  | 231   | 225   | 247   | 532   | 479   | 486   | 5.8867048 | -1.542794618 | down | 1.74E-05  | 0.001134 |
| D1792_05140 | diguanylate cyclase                                         | 1026 | 988   | 829   | 824   | 1145  | 2149  | 2029  | 7.7691434 | -1.537398178 | down | 0.0001034 | 0.0044   |
| D1792_00765 | beta-ketoacyl-ACP reductase                                 | 735  | 1511  | 1894  | 2103  | 2014  | 4538  | 4624  | 8.8679751 | -1.536426861 | down | 0.00199   | 0.035679 |
| D1792_21440 | S-adenosylmethionine decarboxylase proenzyme                | 795  | 810   | 513   | 675   | 926   | 1367  | 1623  | 7.3588488 | -1.519143886 | down | 0.000174  | 0.00634  |
| D1792_20780 | bifunctional aspartate kinase/homoserine dehydrogenase I    | 2463 | 5026  | 4527  | 4205  | 6058  | 10429 | 10668 | 10.134748 | -1.519074967 | down | 0.0010002 | 0.023479 |
| D1792_05430 | DNA damage-inducible protein YebG                           | 291  | 226   | 357   | 382   | 355   | 761   | 816   | 6.3485506 | -1.512985645 | down | 0.0014243 | 0.028957 |
| D1792_26770 | type II toxin-antitoxin system RelE/ParE family toxin       | 348  | 210.5 | 186.5 | 251.5 | 230.5 | 548   | 522.5 | 5.7609491 | -1.512575072 | down | 0.0011531 | 0.025239 |
| D1792_27125 | type II toxin-antitoxin system RelE/ParE family toxin       | 348  | 210.5 | 186.5 | 251.5 | 230.5 | 548   | 522.5 | 5.7609491 | -1.512574969 | down | 0.0011525 | 0.025239 |
| D1792_23875 | peptidylprolyl isomerase B                                  | 495  | 589   | 635   | 634   | 861   | 1474  | 1391  | 7.2561286 | -1.504121233 | down | 7.46E-05  | 0.003362 |
| D1792_23685 | transcriptional regulator                                   | 342  | 51    | 79    | 44    | 87    | 136   | 124   | 3.8225209 | -1.503264308 | down | 0.0018469 | 0.034053 |
| D1792_02365 | YciI family protein                                         | 297  | 98    | 67    | 89    | 149   | 216   | 161   | 4.380025  | -1.493490413 | down | 0.0005524 | 0.015471 |
| oppC        | oligopeptide transport subunit                              | 909  | 948   | 724   | 721   | 1178  | 1825  | 1706  | 7.5869669 | -1.492654298 | down | 3.98E-05  | 0.002159 |
| D1792_19815 | hypothetical protein                                        | 825  | 277   | 538   | 383   | 393   | 913   | 998   | 6.6172764 | -1.492131678 | down | 0.0017605 | 0.033266 |
| D1792_09845 | bifunctional chorismate mutase/prephenate dehydratase       | 1161 | 2095  | 1629  | 1917  | 2508  | 4298  | 4242  | 8.8377697 | -1.487701438 | down | 0.0008502 | 0.021273 |
| D1792_01510 | LexA family transcriptional regulator                       | 696  | 622   | 725   | 689   | 815   | 1718  | 1488  | 7.3702562 | -1.479407393 | down | 0.000192  | 0.006674 |
| D1792_16655 | ATP synthase subunit B                                      | 471  | 771   | 1101  | 1063  | 1084  | 2279  | 2331  | 7.9075768 | -1.473384465 | down | 0.0011583 | 0.025239 |
| D1792_12245 | S-adenosylhomocysteine hydrolase                            | 396  | 456   | 641   | 724   | 595   | 1621  | 1398  | 7.2332618 | -1.472486288 | down | 0.0013092 | 0.027491 |
| D1792_25585 | leucine-responsive regulatory protein                       | 495  | 594   | 600   | 735   | 880   | 1453  | 1464  | 7.3023889 | -1.471847484 | down | 0.0002161 | 0.007235 |
| D1792_02295 | DNA-binding protein H-NS                                    | 414  | 2245  | 3850  | 4119  | 6065  | 6930  | 7474  | 9.7173047 | -1.459639703 | down | 0.0019761 | 0.03557  |
| yobA        | hypothetical protein                                        | 375  | 363   | 612   | 620   | 587   | 1378  | 1188  | 7.0312901 | -1.458012529 | down | 0.0010815 | 0.024142 |
| D1792_04955 | glutamate dehydrogenase                                     | 1344 | 1946  | 2582  | 2479  | 3591  | 5133  | 5032  | 9.1458177 | -1.457136328 | down | 0.000975  | 0.023027 |
| folE        | GTP cyclohydrolase                                          | 669  | 939   | 1058  | 1350  | 1767  | 2552  | 2358  | 8.0936658 | -1.45089441  | down | 0.0005537 | 0.015471 |
| D1792_13405 | tryptophan permease                                         | 1245 | 1692  | 1370  | 890   | 2200  | 2834  | 2476  | 8.2429672 | -1.447144195 | down | 0.0001664 | 0.006163 |
| D1792_02335 | ABC transporter ATP-binding protein                         | 1014 | 1297  | 1335  | 1244  | 1525  | 2914  | 2885  | 8.2643566 | -1.447010339 | down | 0.0010801 | 0.024142 |
| htpX        | heat shock protein                                          | 882  | 1111  | 1315  | 1218  | 2343  | 2450  | 2343  | 8.172103  | -1.430037501 | down | 0.0002002 | 0.006855 |
| D1792_02810 | transcriptional regulator FNR                               | 753  | 1122  | 1375  | 1552  | 1974  | 2769  | 2989  | 8.3416697 | -1.424065768 | down | 0.0013115 | 0.027491 |
| D1792_25125 | DUF1471 domain-containing protein                           | 261  | 40    | 49    | 38    | 90    | 96    | 69    | 3.3346286 | -1.422882248 | down | 0.0010398 | 0.023915 |
| D1792_23280 | HNH endonuclease                                            | 348  | 126   | 141   | 145   | 242   | 334   | 245   | 5.0324468 | -1.421333022 | down | 0.0002751 | 0.008948 |
| D1792_02340 | oligopeptide transport ATP-binding protein OppF             | 1005 | 1595  | 1823  | 1984  | 2029  | 4034  | 4061  | 8.74536   | -1.418899845 | down | 0.0025638 | 0.043244 |
| D1792_14190 | 50S ribosomal protein L14                                   | 372  | 544   | 672   | 780   | 878   | 1299  | 1555  | 7.3188456 | -1.415861892 | down | 0.0007685 | 0.019997 |
| D1792_08380 | NADH-quinone oxidoreductase subunit B                       | 663  | 1064  | 1228  | 1643  | 1809  | 2744  | 2939  | 8.3047886 | -1.411366257 | down | 0.0021515 | 0.037829 |
| ihfA        | integration host factor subunit alpha                       | 300  | 344   | 748   | 782   | 762   | 1342  | 1452  | 7.2443111 | -1.409373535 | down | 0.002709  | 0.045189 |
| D1792_08465 | dihydroneopterin triphosphate 2'-epimerase                  | 363  | 50    | 85    | 59    | 118   | 136   | 118   | 3.9200436 | -1.390107751 | down | 0.0020831 | 0.036913 |
| D1792_01450 | host-nuclease inhibitor protein Gam                         | 297  | 74    | 78    | 69    | 106   | 179   | 133   | 4.0918782 | -1.379519808 | down | 0.0018369 | 0.034006 |
| D1792_17670 | periplasmic protein CpxP                                    | 501  | 681   | 938   | 897   | 1920  | 1576  | 1424  | 7.6137726 | -1.378869639 | down | 4.34E-05  | 0.002244 |
| zapA        | protein localized to the cytokinetic                        | 330  | 231   | 300   | 306   | 381   | 627   | 561   | 6.0291252 | -1.377728132 | down | 0.0005708 | 0.015851 |

|             |                                                            |      |      |      |      |      |      |      |           |              |      |           |          |
|-------------|------------------------------------------------------------|------|------|------|------|------|------|------|-----------|--------------|------|-----------|----------|
| D1792_23185 | pyrimidine/purine nucleoside phosphorylase                 | 285  | 483  | 764  | 1007 | 1176 | 1557 | 1573 | 7.4922725 | -1.374393326 | down | 0.0011817 | 0.025561 |
| D1792_02325 | peptide ABC transporter permease                           | 921  | 792  | 473  | 673  | 627  | 1424 | 1395 | 7.2078841 | -1.368338466 | down | 0.0015996 | 0.030736 |
| purU        | formyltetrahydrofolate deformylase                         | 843  | 742  | 642  | 640  | 959  | 1398 | 1311 | 7.2583396 | -1.359470913 | down | 0.0001069 | 0.004507 |
| D1792_24060 | LPS O-antigen length regulator                             | 1134 | 590  | 357  | 506  | 658  | 985  | 975  | 6.7857211 | -1.357233786 | down | 0.0004532 | 0.013314 |
| D1792_11250 | hemolysin III family protein                               | 660  | 1532 | 1982 | 1811 | 2318 | 3596 | 3660 | 8.6666187 | -1.351312589 | down | 0.0021134 | 0.037304 |
| yhbY        | predicted RNA-binding protein                              | 294  | 83   | 127  | 121  | 220  | 236  | 182  | 4.6781766 | -1.349001049 | down | 0.0010925 | 0.024174 |
| evgS        | hybrid sensory histidine kinase in two-component system    | 3594 | 875  | 729  | 646  | 1114 | 1482 | 1410 | 7.385065  | -1.342919965 | down | 7.92E-05  | 0.0035   |
| D1792_03645 | diguanylate cyclase                                        | 891  | 359  | 280  | 302  | 669  | 598  | 494  | 6.1374097 | -1.334711853 | down | 3.77E-05  | 0.002067 |
| D1792_22100 | hypothetical protein                                       | 810  | 138  | 71   | 69   | 141  | 237  | 133  | 4.3442086 | -1.331504447 | down | 0.0018938 | 0.034498 |
| D1792_02495 | LysR family transcriptional regulator CysB                 | 975  | 1064 | 1022 | 1075 | 1924 | 2039 | 1843 | 7.8926998 | -1.329674928 | down | 0.0001177 | 0.004873 |
| proQ        | putative DNA competence effector                           | 699  | 1113 | 1473 | 1412 | 1914 | 2527 | 2678 | 8.2408053 | -1.325347787 | down | 0.0018332 | 0.034006 |
| D1792_24400 | endoribonuclease YbeY                                      | 468  | 631  | 616  | 665  | 746  | 1276 | 1314 | 7.1646919 | -1.320205327 | down | 0.0007892 | 0.020304 |
| D1792_03020 | LysR family transcriptional regulator                      | 924  | 1070 | 1079 | 1176 | 1471 | 2330 | 2128 | 7.9643831 | -1.31815115  | down | 0.0007778 | 0.020125 |
| D1792_23310 | N utilization substance protein B                          | 420  | 830  | 1341 | 1346 | 1516 | 2297 | 2426 | 8.0648647 | -1.314720851 | down | 0.0031282 | 0.049957 |
| D1792_08385 | NADH-quinone oxidoreductase subunit A                      | 444  | 382  | 509  | 392  | 537  | 786  | 873  | 6.5681693 | -1.306170378 | down | 0.0008991 | 0.022013 |
| D1792_18620 | regulatory protein SoxS                                    | 324  | 161  | 177  | 135  | 301  | 320  | 242  | 5.1199568 | -1.305042465 | down | 0.000266  | 0.008715 |
| bamE        | hypothetical protein                                       | 342  | 131  | 212  | 138  | 245  | 322  | 286  | 5.1519481 | -1.304311681 | down | 0.001316  | 0.027491 |
| D1792_16165 | hypothetical protein                                       | 1827 | 296  | 567  | 179  | 519  | 576  | 647  | 6.2134284 | -1.297650033 | down | 0.0022815 | 0.039357 |
| D1792_14070 | peptide deformylase                                        | 510  | 820  | 1077 | 997  | 1172 | 2035 | 1851 | 7.748581  | -1.293945898 | down | 0.0010161 | 0.023608 |
| D1792_18240 | malate synthase A                                          | 1602 | 4109 | 5595 | 5350 | 9820 | 8204 | 8879 | 10.127503 | -1.286929752 | down | 0.0028424 | 0.047071 |
| D1792_07745 | hypothetical protein                                       | 345  | 371  | 586  | 472  | 501  | 1050 | 919  | 6.7229885 | -1.285400025 | down | 0.0019387 | 0.035175 |
| D1792_13480 | protein-export membrane protein                            | 333  | 261  | 346  | 486  | 591  | 691  | 688  | 6.3772093 | -1.279688056 | down | 0.0018097 | 0.033777 |
| D1792_04850 | nucleotide excision repair endonuclease                    | 888  | 1011 | 894  | 864  | 1263 | 2015 | 1563 | 7.6513136 | -1.278865014 | down | 0.0001963 | 0.006772 |
| D1792_24320 | ribosome silencing factor RsfS                             | 318  | 86   | 109  | 110  | 147  | 279  | 142  | 4.504036  | -1.275227255 | down | 0.0030429 | 0.049197 |
| D1792_25955 | BAX inhibitor protein                                      | 660  | 735  | 890  | 946  | 1740 | 1414 | 1453 | 7.5724869 | -1.274181883 | down | 0.0002217 | 0.007368 |
| D1792_24395 | magnesium and cobalt efflux protein CorC                   | 879  | 1158 | 1265 | 1220 | 1602 | 2351 | 2272 | 8.0542078 | -1.268368597 | down | 0.0013548 | 0.02802  |
| trpE        | anthranilate synthase component I                          | 1563 | 1434 | 1207 | 807  | 1802 | 2344 | 1774 | 7.9229834 | -1.268108509 | down | 0.0001716 | 0.006302 |
| D1792_25760 | DUF882 domain-containing protein                           | 549  | 453  | 398  | 342  | 569  | 781  | 687  | 6.4186319 | -1.267413849 | down | 0.0002288 | 0.007551 |
| D1792_18090 | 50S ribosomal protein L7/L12                               | 366  | 677  | 938  | 1140 | 1149 | 1795 | 1806 | 7.6812571 | -1.255884546 | down | 0.0027973 | 0.046492 |
| D1792_16175 | hypothetical protein                                       | 1101 | 353  | 654  | 486  | 591  | 1043 | 915  | 6.7656824 | -1.254499061 | down | 0.0018826 | 0.034498 |
| minC        | septum formation inhibitor                                 | 696  | 902  | 1017 | 1159 | 1192 | 2131 | 1941 | 7.8202501 | -1.254455993 | down | 0.0019694 | 0.035557 |
| D1792_16650 | ATP synthase subunit delta                                 | 534  | 713  | 902  | 589  | 937  | 1448 | 1299 | 7.2916529 | -1.25162324  | down | 0.0004115 | 0.012475 |
| yceD        | hypothetical protein                                       | 522  | 522  | 562  | 643  | 709  | 1165 | 1067 | 6.9778773 | -1.245266749 | down | 0.0010475 | 0.023972 |
| D1792_11770 | fimbrial protein                                           | 1011 | 266  | 167  | 130  | 225  | 353  | 324  | 5.2761145 | -1.226295469 | down | 0.0028565 | 0.047132 |
| D1792_13745 | DUF1043 family protein                                     | 399  | 603  | 985  | 879  | 920  | 1604 | 1561 | 7.4761522 | -1.220507277 | down | 0.0029167 | 0.047608 |
| D1792_21710 | ribosome-recycling factor                                  | 558  | 1120 | 1516 | 1499 | 2085 | 2428 | 2447 | 8.2178493 | -1.217637934 | down | 0.0030464 | 0.049197 |
| panD        | aspartate 1-decarboxylase precursor                        | 381  | 293  | 280  | 283  | 470  | 512  | 448  | 5.9096057 | -1.192112976 | down | 0.0005161 | 0.014782 |
| D1792_02380 | intracellular septation protein A                          | 540  | 366  | 245  | 273  | 356  | 524  | 515  | 5.9268977 | -1.176037553 | down | 0.0022414 | 0.039205 |
| D1792_14350 | 30S ribosomal protein S7                                   | 471  | 459  | 441  | 524  | 570  | 858  | 854  | 6.6440582 | -1.171210776 | down | 0.0023365 | 0.039903 |
| D1792_08055 | DNA-binding response regulator                             | 651  | 1059 | 1136 | 1310 | 1504 | 2185 | 2013 | 7.9466334 | -1.170213383 | down | 0.0026545 | 0.044608 |
| D1792_23625 | adenylate kinase                                           | 645  | 894  | 1075 | 1120 | 1569 | 1666 | 1769 | 7.7590822 | -1.166025388 | down | 0.001463  | 0.029169 |
| D1792_26390 | methyltransferase domain-containing protein                | 1059 | 794  | 471  | 573  | 639  | 1209 | 1030 | 6.9685391 | -1.159997741 | down | 0.0022803 | 0.039357 |
| ribA        | GTP cyclohydrolase II protein                              | 591  | 643  | 739  | 647  | 722  | 1370 | 1128 | 7.1254837 | -1.154824033 | down | 0.0017737 | 0.033377 |
| D1792_11150 | molybdopterin-dependent oxidoreductase FAD-binding subunit | 780  | 953  | 962  | 878  | 1100 | 1677 | 1587 | 7.5769445 | -1.148684151 | down | 0.0014439 | 0.029095 |
| D1792_12470 | hydrogenase-2 assembly chaperone                           | 489  | 480  | 660  | 555  | 647  | 1065 | 944  | 6.8587808 | -1.132758611 | down | 0.0024685 | 0.04179  |

|             |                                                                            |      |         |        |         |         |        |         |           |              |      |           |          |
|-------------|----------------------------------------------------------------------------|------|---------|--------|---------|---------|--------|---------|-----------|--------------|------|-----------|----------|
| D1792_22805 | LuxR family transcriptional regulator                                      | 795  | 727     | 461    | 353     | 786     | 936    | 677     | 6.6498518 | -1.118719535 | down | 0.0004585 | 0.013384 |
| D1792_09505 | Fe-S cluster assembly transcriptional regulator IscR                       | 489  | 374     | 432    | 381     | 660     | 589    | 595     | 6.3138507 | -1.095394424 | down | 0.0012559 | 0.026725 |
| D1792_24360 | amino acid ABC transporter ATP-binding protein                             | 726  | 717     | 915    | 605     | 880     | 1214   | 1197    | 7.1929389 | -1.075098293 | down | 0.0024032 | 0.040837 |
| D1792_05480 | Mn2+/Zn2+ABC transporter ATP-binding protein                               | 756  | 721     | 784    | 656     | 787     | 1415   | 1034    | 7.1380791 | -1.051458093 | down | 0.0022568 | 0.039227 |
| D1792_22790 | autotransporter outer membrane beta-barrel domain-containing protein       | 1194 | 1269    | 782    | 691     | 1135    | 1682   | 1221    | 7.4421341 | -1.048592542 | down | 0.0014138 | 0.028873 |
| D1792_24365 | glutamate ABC transporter permease                                         | 675  | 525     | 324    | 360     | 591     | 642    | 548     | 6.2720811 | -1.030189397 | down | 0.0020303 | 0.036259 |
| D1792_24560 | flavodoxin-1                                                               | 531  | 456     | 328    | 437     | 582     | 664    | 578     | 6.3155311 | -1.028559581 | down | 0.003099  | 0.049869 |
| D1792_27625 | peptidyl-arginine deiminase                                                | 663  | 725     | 477    | 536     | 825.5   | 966.5  | 777.5   | 6.7975906 | -1.025314918 | down | 0.0014732 | 0.029169 |
| D1792_27380 | peptidyl-arginine deiminase                                                | 663  | 725     | 477    | 536     | 825.5   | 966.5  | 777.5   | 6.7975906 | -1.025314332 | down | 0.0014693 | 0.029169 |
| D1792_18380 | maltose ABC transporter permease                                           | 891  | 1329    | 1512   | 1046    | 797     | 584    | 183     | 6.9294023 | 1.02561122   | up   | 0.0029554 | 0.048068 |
| D1792_13290 | PTS mannose/fructose/sorbose transporter family subunit IID                | 879  | 1087    | 1388   | 1136    | 599     | 481    | 288     | 6.8408316 | 1.043326934  | up   | 0.0005865 | 0.016091 |
| D1792_26270 | putative C-S lyase                                                         | 1164 | 1900    | 2362   | 2241    | 942     | 923    | 569     | 7.6978339 | 1.050935151  | up   | 0.0008075 | 0.020659 |
| D1792_19055 | fliK flagellar hook-length control protein                                 | 1128 | 1518    | 1644   | 1510    | 857     | 708    | 263     | 7.205355  | 1.061522727  | up   | 0.0008222 | 0.020918 |
| D1792_18400 | cadaverine/lysine antiporter                                               | 1335 | 1975    | 1657   | 1655    | 907     | 845    | 295     | 7.3716978 | 1.065779799  | up   | 0.0006126 | 0.016629 |
| D1792_00695 | maltose/maltodextrin import ATP-binding protein MalK                       | 1116 | 1504    | 1753   | 983     | 820     | 663    | 171     | 7.0246578 | 1.067991561  | up   | 0.0031374 | 0.049957 |
| D1792_17245 | flagellar L-ring protein                                                   | 699  | 694     | 873    | 694     | 442     | 278    | 143     | 6.1548022 | 1.071442033  | up   | 0.0014959 | 0.02949  |
| malF        | 2-dehydro-3-deoxy-6-phosphogalactonate aldolase                            | 630  | 710     | 868    | 656     | 383     | 308    | 145     | 6.1268488 | 1.084805339  | up   | 0.0007143 | 0.018911 |
| prpR        | maltose transporter subunit                                                | 1545 | 2602    | 2555   | 2154    | 1314    | 1078   | 364     | 7.8188344 | 1.113215466  | up   | 0.0009559 | 0.022916 |
| D1792_17255 | DNA-binding transcriptional activator                                      | 1587 | 2526    | 2862   | 2383    | 1455    | 1068   | 384     | 7.9090798 | 1.13374691   | up   | 0.0012987 | 0.027491 |
| treC        | IcIR family transcriptional regulator                                      | 768  | 1331    | 1611   | 1232    | 695     | 559    | 259     | 7.0101888 | 1.13474259   | up   | 0.0001892 | 0.006674 |
| D1792_18435 | trehalose-6-P hydrolase                                                    | 1656 | 4786    | 5321   | 5370    | 1822    | 2120   | 1291    | 8.9043678 | 1.183319282  | up   | 0.0016371 | 0.031193 |
| gadC        | diacylglycerol kinase                                                      | 369  | 268     | 254    | 216     | 98      | 82     | 61      | 4.5020941 | 1.203726438  | up   | 0.0015585 | 0.030461 |
| D1792_08540 | predicted glutamate:gamma-aminobutyric acid antiporter                     | 1536 | 1969    | 2393   | 2582    | 780     | 904    | 617     | 7.75543   | 1.205440281  | up   | 0.0003195 | 0.010319 |
| D1792_06940 | aspartate-semialdehyde                                                     | 1014 | 1960    | 2590   | 2406    | 922     | 856    | 546     | 7.7452249 | 1.215776393  | up   | 0.0001564 | 0.005963 |
| flgJ        | UDP-glucose 6-dehydrogenase                                                | 1167 | 980     | 935    | 1143    | 470     | 364    | 208     | 6.5644419 | 1.225948993  | up   | 0.0001509 | 0.005924 |
| D1792_15895 | flagellar biosynthesis protein                                             | 942  | 1484    | 1658   | 1402    | 753     | 609    | 193     | 7.0959356 | 1.268564091  | up   | 0.0001605 | 0.006042 |
| D1792_24585 | divergent polysaccharide deacetylase family protein                        | 960  | 1700    | 1928   | 1501    | 837     | 625    | 241     | 7.2578193 | 1.288457108  | up   | 5.55E-05  | 0.002686 |
| D1792_11500 | putrescine-ornithine antiporter                                            | 1320 | 2534    | 2958   | 2740    | 1042    | 1038   | 526     | 7.9499131 | 1.316402932  | up   | 5.75E-05  | 0.002707 |
| D1792_13310 | galactose-proton symporter                                                 | 1395 | 2528    | 3080   | 2588    | 1237    | 954    | 418     | 7.9291981 | 1.343603565  | up   | 7.56E-05  | 0.003376 |
| flgI        | tagatose-1%2C6-bisphosphate aldolase                                       | 861  | 1452    | 1816   | 1254    | 758     | 540    | 166     | 7.0548362 | 1.348821289  | up   | 0.0001336 | 0.005382 |
| malM        | homolog of Salmonella P-ring of flagella basal body                        | 1098 | 1439    | 1808   | 1489    | 798     | 555    | 179     | 7.1337601 | 1.363320317  | up   | 0.0001273 | 0.005176 |
| D1792_03400 | maltose regulon periplasmic protein                                        | 921  | 1857    | 1882   | 1906    | 881     | 657    | 246     | 7.3870734 | 1.381061182  | up   | 3.08E-05  | 0.00173  |
| D1792_25325 | glutamate decarboxylase beta                                               | 1401 | 3556.11 | 4942.6 | 4938.34 | 1340.09 | 1530.6 | 1057.43 | 8.655376  | 1.385848194  | up   | 0.0003984 | 0.012273 |
| D1792_17805 | L-threonine/L-serine transporter                                           | 1332 | 5985    | 8267   | 9359    | 1732    | 2536   | 2037    | 9.4553339 | 1.47831657   | up   | 0.0008661 | 0.021528 |
| D1792_13285 | undecaprenyl-diphosphate                                                   | 597  | 723     | 962    | 895     | 362     | 255    | 122     | 6.2380087 | 1.503790163  | up   | 1.35E-05  | 0.000947 |
| D1792_00665 | nucleoside-specific channel-forming protein Tsx                            | 861  | 88      | 93     | 49      | 25      | 29     | 8       | 2.7522994 | 1.532165767  | up   | 0.0014388 | 0.029095 |
| D1792_05270 | PTS mannose/fructose/sorbose/N-acetylgalactosamine transporter subunit IIC | 780  | 1472    | 1915   | 1904    | 558     | 568    | 288     | 7.2587715 | 1.572418666  | up   | 5.92E-07  | 8.17E-05 |
| D1792_05270 | flagellar biosynthesis protein FlgB                                        | 417  | 471     | 614    | 659     | 174     | 155    | 119     | 5.6702952 | 1.581644821  | up   | 1.65E-05  | 0.00111  |
| D1792_05270 | PTS mannose transporter subunit IID                                        | 852  | 6844    | 9608   | 11298   | 1520    | 2610   | 2489    | 9.6623435 | 1.598645105  | up   | 0.000949  | 0.022916 |



|             |                                                   |      |       |        |        |       |       |       |           |                |           |          |
|-------------|---------------------------------------------------|------|-------|--------|--------|-------|-------|-------|-----------|----------------|-----------|----------|
| flgC        | flagellar basal-body rod protein C                | 405  | 577   | 722    | 770    | 183   | 219   | 128   | 5.9066912 | 1.602388889 up | 4.49E-06  | 0.000402 |
| D1792_26285 | SIS domain-containing protein                     | 624  | 706   | 1024   | 952    | 309   | 292   | 105   | 6.2635452 | 1.645106734 up | 3.70E-06  | 0.000351 |
| D1792_08765 | oxalyl-CoA decarboxylase                          | 1695 | 2475  | 2477   | 2543   | 1030  | 809   | 172   | 7.7210159 | 1.67228722 up  | 4.08E-05  | 0.002188 |
| D1792_08775 | hypothetical protein                              | 633  | 579   | 631    | 561    | 210   | 201   | 45    | 5.6323991 | 1.700175619 up | 2.01E-05  | 0.001238 |
| D1792_01585 | porin                                             | 1083 | 19031 | 31179  | 33076  | 3188  | 7011  | 7276  | 11.21081  | 1.746628635 up | 0.001073  | 0.024142 |
| D1792_13195 | propionate kinase                                 | 1209 | 6806  | 8935   | 10971  | 1469  | 2313  | 1981  | 9.5664482 | 1.772473671 up | 0.0001371 | 0.005475 |
| D1792_06760 | hypothetical protein                              | 411  | 239   | 403    | 402    | 52    | 68    | 93    | 4.8986312 | 1.780987291 up | 0.000385  | 0.012093 |
| flgD        | flagellar basal body rod modification protein D   | 696  | 1849  | 2563   | 2944   | 530   | 641   | 444   | 7.6964674 | 1.807965774 up | 5.27E-07  | 7.50E-05 |
| ompA        | outer membrane protein A                          | 1053 | 63663 | 106299 | 134546 | 11418 | 23789 | 25922 | 13.082842 | 1.822886898 up | 0.0010081 | 0.023544 |
| D1792_00685 | flagellar basal body rod protein FlgF             | 756  | 2048  | 2606   | 2521   | 640   | 598   | 351   | 7.6343014 | 1.823713816 up | 1.20E-08  | 3.04E-06 |
| D1792_13275 | tagatose-1%2C6-bisphosphate aldolase              | 1281 | 2953  | 4122   | 3576   | 1179  | 886   | 362   | 8.1928995 | 1.849016469 up | 2.26E-06  | 0.000257 |
| D1792_13280 | PTS N-acetylgalactosamine transporter subunit IIB | 474  | 563   | 895    | 879    | 204   | 213   | 102   | 6.0292397 | 1.855336137 up | 2.86E-07  | 4.34E-05 |
| D1792_03445 | putative oxidoreductase                           | 2280 | 3528  | 4205   | 4033   | 1373  | 1050  | 287   | 8.3298526 | 1.877637517 up | 1.08E-05  | 0.000819 |
| ydeO        | predicted DNA-binding transcriptional activator   | 762  | 57    | 86     | 72     | 29    | 20    | 1     | 2.6357343 | 1.892272274 up | 0.0023395 | 0.039903 |
| D1792_13305 | AgaS family sugar isomerase                       | 1155 | 2951  | 4322   | 3890   | 1233  | 941   | 305   | 8.2520897 | 1.919270667 up | 4.50E-06  | 0.000402 |
| hdeA        | acid-resistance protein, possible chaperone       | 333  | 2002  | 3477   | 4031   | 275   | 726   | 736   | 8.0493117 | 1.953710894 up | 0.0002039 | 0.006914 |
| D1792_00680 | flagellar hook protein FlgE                       | 1206 | 5924  | 6969   | 8777   | 1239  | 1498  | 1153  | 9.1968515 | 2.076963699 up | 1.29E-06  | 0.000162 |
| D1792_08770 | formyl-CoA--oxalate CoA-transferase               | 1251 | 1756  | 1947   | 2142   | 566   | 438   | 142   | 7.2866341 | 2.097031842 up | 5.87E-09  | 1.91E-06 |
| D1792_20000 | autotransporter adhesin Ag43                      | 2847 | 18424 | 27946  | 31682  | 3971  | 5321  | 4288  | 11.043999 | 2.108915213 up | 6.61E-06  | 0.000537 |
| D1792_15315 | acid stress chaperone HdeB                        | 327  | 951   | 1723   | 1521   | 124   | 278   | 264   | 6.8074066 | 2.158152301 up | 2.90E-06  | 0.000301 |
| D1792_18170 | zinc resistance-associated protein                | 420  | 1864  | 3477   | 3859   | 393   | 597   | 518   | 7.9574603 | 2.180403782 up | 1.17E-06  | 0.000152 |
| D1792_00690 | flagellar basal body rod protein FlgG             | 783  | 2315  | 3348   | 3908   | 535   | 618   | 417   | 7.9943835 | 2.241352705 up | 8.22E-09  | 2.34E-06 |
| D1792_13205 | serine/threonine dehydratase                      | 990  | 7943  | 12868  | 14628  | 1208  | 2190  | 1857  | 9.8736969 | 2.309255845 up | 3.81E-06  | 0.000354 |
| malE        | maltose ABC transporter periplasmic protein       | 1191 | 4258  | 5329   | 6000   | 956   | 860   | 616   | 8.6721451 | 2.312920991 up | 7.85E-09  | 2.34E-06 |
| D1792_19050 | lysine decarboxylase CadA                         | 2148 | 9399  | 12890  | 14551  | 1611  | 1994  | 1249  | 9.8801463 | 2.557858102 up | 5.85E-09  | 1.91E-06 |
| D1792_18405 | maltoporin                                        | 1341 | 5359  | 7014   | 7377   | 1082  | 884   | 366   | 8.9377813 | 2.804430146 up | 4.09E-11  | 2.66E-08 |
| D1792_15350 | hypothetical protein                              | 282  | 14    | 12     | 9      | 3     | 0     | 0     | 0.1935973 | 3.043871527 up | 0.0003994 | 0.012273 |
| D1792_15900 | glycosyltransferase                               | 1035 | 5244  | 6903   | 9216   | 566   | 492   | 213   | 8.9825114 | 3.806677264 up | 3.77E-16  | 1.72E-12 |
| D1792_01180 | phage terminase large subunit family protein      | 207  | 12    | 9      | 2      | 0     | 0     | 0     | -0.328688 | 5.727408491 up | 0.000183  | 0.006568 |

Supplementary Table S3. The different expression of genes in sample C vs. sample B through transcriptome

| GeneID      | Annotation                                                   | length | C_25992-1-<br>2_1_reads<br>Count | C_25992-1-<br>2_2_reads<br>Count | C_25992-1-<br>2_3_reads<br>Count | B_25992-<br>1_1_reads<br>Count | B_25992-<br>1_2_reads<br>Count | B_25992-<br>1_3_reads<br>Count | logCPM     | log2Ratio(C/B) | Up-Down-<br>Regulation(C<br>_25992_1_2/B<br>_25992_1) | P-value    | FDR         |
|-------------|--------------------------------------------------------------|--------|----------------------------------|----------------------------------|----------------------------------|--------------------------------|--------------------------------|--------------------------------|------------|----------------|-------------------------------------------------------|------------|-------------|
| D1792_06205 | Hypothetical protein                                         | 291    | 0                                | 11                               | 19                               | 0                              | 0                              | 0                              | 0.01622666 | 6.288436231    | up                                                    | 6.30E-05   | 0.007189449 |
| D1792_08715 | MULTISPECIES: DNA<br>recombinase                             | 570    | 7                                | 4                                | 12                               | 0                              | 0                              | 0                              | -0.2119809 | 6.043570473    | up                                                    | 2.37E-05   | 0.003098102 |
| D1792_01810 | MULTISPECIES: regulatory<br>protein AriR                     | 267    | 8                                | 5                                | 9                                | 0                              | 0                              | 0                              | -0.2446939 | 6.009644888    | up                                                    | 2.87E-05   | 0.003450484 |
| D1792_27685 | hypothetical protein                                         | 246    | 54.5                             | 62.5                             | 59.5                             | 1                              | 3                              | 0                              | 2.30853533 | 5.544173049    | up                                                    | 5.99E-15   | 9.11E-12    |
| D1792_27500 | hypothetical protein                                         | 246    | 54.5                             | 62.5                             | 59.5                             | 1                              | 3                              | 0                              | 2.30853533 | 5.544162769    | up                                                    | 5.91E-15   | 9.11E-12    |
| D1792_06175 | MULTISPECIES: hypothetical<br>protein                        | 732    | 63                               | 39                               | 27                               | 4                              | 0                              | 1                              | 1.9637408  | 4.889511268    | up                                                    | 1.45E-09   | 6.20E-07    |
| D1792_27505 | hypothetical protein                                         | 324    | 12.67                            | 13.33                            | 11.33                            | 0                              | 1.33                           | 0                              | 0.34423453 | 4.659172696    | up                                                    | 1.44E-06   | 0.0002708   |
| D1792_27680 | hypothetical protein                                         | 324    | 12.67                            | 13.33                            | 11.33                            | 0                              | 1.33                           | 0                              | 0.34423453 | 4.659136475    | up                                                    | 1.42E-06   | 0.0002708   |
| D1792_27330 | hypothetical protein                                         | 324    | 12.67                            | 13.33                            | 11.33                            | 0                              | 1.33                           | 0                              | 0.34423453 | 4.659128905    | up                                                    | 1.42E-06   | 0.0002708   |
| D1792_06480 | MULTISPECIES: 4&apos;-<br>phosphopantetheinyl<br>transferase | 735    | 396                              | 519                              | 307                              | 4                              | 32                             | 20                             | 5.10703175 | 4.64150324     | up                                                    | 2.72E-14   | 2.48E-11    |
| D1792_22260 | MULTISPECIES: hypothetical<br>protein                        | 966    | 51                               | 69                               | 85                               | 5                              | 4                              | 0                              | 2.51038597 | 4.637217589    | up                                                    | 1.23E-13   | 9.33E-11    |
| tdcR        | threonine dehydratase operon<br>activator protein            | 345    | 13                               | 11                               | 21                               | 0                              | 2                              | 0                              | 0.55016779 | 4.417657715    | up                                                    | 1.48E-06   | 0.0002708   |
| D1792_06120 | TcpC                                                         | 864    | 117                              | 127                              | 62                               | 0                              | 5                              | 11                             | 3.16664833 | 4.398511508    | up                                                    | 9.91E-09   | 3.23E-06    |
| D1792_06170 | rep protein                                                  | 582    | 59                               | 32                               | 93                               | 4                              | 4                              | 2                              | 2.3868218  | 4.333893462    | up                                                    | 1.12E-10   | 5.68E-08    |
| D1792_12305 | glycerol-3-phosphate<br>cytidyltransferase                   | 396    | 26                               | 19                               | 35                               | 0                              | 0                              | 4                              | 1.28097825 | 4.326454374    | up                                                    | 8.73E-08   | 2.49E-05    |
| D1792_06960 | Glycosyl transferase group 1                                 | 1206   | 281                              | 356                              | 264                              | 10                             | 35                             | 14                             | 4.67860708 | 4.146446684    | up                                                    | 1.01E-14   | 1.15E-11    |
| D1792_16330 | hypothetical membrane protein                                | 861    | 31                               | 39                               | 26                               | 0                              | 1                              | 5                              | 1.5498873  | 4.072081398    | up                                                    | 8.09E-08   | 2.46E-05    |
| D1792_06970 | MULTISPECIES: glycosyl<br>transferase family 1               | 1146   | 242                              | 194                              | 135                              | 11                             | 13                             | 16                             | 4.08706355 | 4.065975882    | up                                                    | 1.79E-12   | 1.17E-09    |
| D1792_27430 | microcin C7 self-immunity<br>protein MccF                    | 1035   | 544                              | 483                              | 443                              | 29                             | 75                             | 29                             | 5.43441973 | 3.720189347    | up                                                    | 4.69E-15   | 9.11E-12    |
| D1792_12290 | XcbB                                                         | 1029   | 410                              | 470                              | 273                              | 16                             | 59                             | 40                             | 5.10287748 | 3.542659501    | up                                                    | 5.73E-11   | 3.27E-08    |
| D1792_03245 | MULTISPECIES: hypothetical<br>protein                        | 822    | 9                                | 8                                | 6                                | 0                              | 2                              | 0                              | -0.116389  | 3.513761368    | up                                                    | 0.00056744 | 0.044384306 |
| D1792_27640 | DNA distortion polypeptide 3                                 | 357    | 40.5                             | 51                               | 85                               | 2                              | 15.5                           | 1.5                            | 2.36416934 | 3.367558042    | up                                                    | 9.10E-07   | 0.000197934 |
| D1792_27365 | DNA distortion polypeptide 3                                 | 357    | 40.5                             | 51                               | 85                               | 2                              | 15.5                           | 1.5                            | 2.36416934 | 3.367552172    | up                                                    | 9.07E-07   | 0.000197934 |
| D1792_06495 | unnamed protein product                                      | 399    | 18                               | 13                               | 33                               | 1                              | 6                              | 0                              | 1.03832797 | 3.308615944    | up                                                    | 1.58E-05   | 0.002115996 |
| D1792_15330 | Uncharacterised protein<br>(plasmid)                         | 528    | 112                              | 97                               | 73                               | 11                             | 24                             | 1                              | 3.12123816 | 3.282149398    | up                                                    | 2.22E-06   | 0.000364953 |
| D1792_27650 | RepB family plasmid<br>replication initiator protein         | 843    | 92.5                             | 89                               | 122                              | 6                              | 30.5                           | 2.5                            | 3.17587264 | 3.195580663    | up                                                    | 2.53E-06   | 0.000384653 |
| D1792_27355 | RepB family plasmid<br>replication initiator protein         | 843    | 92.5                             | 89                               | 122                              | 6                              | 30.5                           | 2.5                            | 3.17587264 | 3.195569478    | up                                                    | 2.51E-06   | 0.000384653 |
| D1792_22925 | UPF0379 protein yahO                                         | 276    | 10                               | 19                               | 4                                | 1                              | 3                              | 0                              | 0.29447078 | 3.168230321    | up                                                    | 0.00031787 | 0.027384609 |
| D1792_11760 | PapX protein                                                 | 552    | 722.86                           | 512.96                           | 411.04                           | 16.64                          | 238.9                          | 22.06                          | 5.71270204 | 2.923119297    | up                                                    | 0.00015177 | 0.014436766 |
| D1792_01505 | Uncharacterised protein<br>(plasmid)                         | 558    | 195                              | 203                              | 201                              | 16                             | 81                             | 1                              | 4.19409136 | 2.913521857    | up                                                    | 0.0004875  | 0.039748567 |
| D1792_06980 | Glycosyl transferase                                         | 861    | 338                              | 384                              | 329                              | 27                             | 131                            | 16                             | 5.00698395 | 2.871169202    | up                                                    | 3.46E-06   | 0.000509648 |
| D1792_27740 | mccC, MFS transporter                                        | 1215   | 146.5                            | 178                              | 139.5                            | 26.5                           | 36.5                           | 16                             | 3.84620268 | 2.780431375    | up                                                    | 7.47E-09   | 2.62E-06    |
| D1792_27445 | MFS transporter                                              | 1215   | 146.5                            | 178                              | 139.5                            | 26.5                           | 36.5                           | 16                             | 3.84620268 | 2.780427108    | up                                                    | 7.40E-09   | 2.62E-06    |

|             |                                                        |      |       |       |       |       |       |        |            |              |      |            |             |
|-------------|--------------------------------------------------------|------|-------|-------|-------|-------|-------|--------|------------|--------------|------|------------|-------------|
| D1792_26225 | membrane protein                                       | 1818 | 7560  | 5629  | 5033  | 615   | 2634  | 371    | 9.19629061 | 2.665390215  | up   | 1.77E-06   | 0.000310432 |
| D1792_17080 | Protein of uncharacterised function (DUF3289)          | 849  | 41    | 54    | 74    | 12    | 19    | 0      | 2.39354    | 2.65538073   | up   | 8.50E-05   | 0.00902242  |
| D1792_27745 | mccD                                                   | 804  | 233.5 | 256   | 205.5 | 19.5  | 92    | 33     | 4.47292916 | 2.502625697  | up   | 7.10E-06   | 0.000982409 |
| D1792_27440 | mccD                                                   | 804  | 233.5 | 256   | 205.5 | 19.5  | 92    | 33     | 4.47292916 | 2.502625427  | up   | 7.09E-06   | 0.000982409 |
| D1792_12300 | licD family protein                                    | 1236 | 218   | 129   | 132   | 32    | 76    | 14     | 4.02576852 | 2.307508877  | up   | 0.00014531 | 0.014117086 |
| D1792_11780 | fimbrial protein papE                                  | 528  | 83    | 57    | 99    | 22    | 38    | 3      | 2.99097139 | 2.194339385  | up   | 0.00057682 | 0.044384306 |
| D1792_06975 | Glycosyl transferase                                   | 1032 | 364   | 330   | 308   | 77    | 169   | 26     | 5.06210184 | 2.179787654  | up   | 4.86E-05   | 0.005694612 |
| D1792_16165 | conserved phage-associated protein                     | 1827 | 1456  | 1152  | 1160  | 296   | 567   | 179    | 6.98766577 | 2.139374953  | up   | 1.49E-09   | 6.20E-07    |
| D1792_27735 | bacteriocin biosynthesis cyclodehydratase, SagC family | 1128 | 283.5 | 266   | 262   | 53    | 92.5  | 68.5   | 4.75919818 | 2.13133662   | up   | 8.68E-07   | 0.000197934 |
| D1792_27450 | bacteriocin biosynthesis cyclodehydratase, SagC family | 1128 | 283.5 | 266   | 262   | 53    | 92.5  | 68.5   | 4.75919818 | 2.131335506  | up   | 8.47E-07   | 0.000197934 |
| D1792_06095 | MULTISPECIES: hypothetical protein                     | 1821 | 352   | 360   | 239   | 68    | 121   | 107    | 5.05462342 | 1.901212972  | up   | 2.53E-05   | 0.003207756 |
| D1792_20075 | DNA cytosine methyltransferase                         | 1191 | 318   | 311   | 250   | 74    | 174   | 50     | 4.9459949  | 1.835751732  | up   | 0.00012886 | 0.012791241 |
| D1792_22095 | MULTISPECIES: hypothetical protein                     | 738  | 159   | 218   | 119   | 34    | 81    | 52     | 4.12715191 | 1.781759919  | up   | 0.00038753 | 0.032171669 |
| D1792_27415 | ATP-dependent endonuclease                             | 1902 | 938.5 | 830.5 | 673   | 183.5 | 567.5 | 140    | 6.44782992 | 1.750117683  | up   | 7.10E-05   | 0.007713556 |
| D1792_27590 | ATP-dependent endonuclease                             | 1902 | 938.5 | 830.5 | 673   | 183.5 | 567.5 | 140    | 6.44782992 | 1.750117267  | up   | 7.08E-05   | 0.007713556 |
| D1792_01500 | MULTISPECIES: hypothetical protein                     | 753  | 592   | 488   | 443   | 148   | 353   | 101    | 5.79597619 | 1.628789173  | up   | 0.00023536 | 0.021932102 |
| D1792_07350 | fimbrial protein                                       | 543  | 725   | 416   | 486   | 204   | 377   | 164    | 5.96941545 | 1.423215592  | up   | 0.00058324 | 0.044384306 |
| D1792_06955 | Mannose-1-phosphate guanylyltransferase                | 1440 | 1637  | 1298  | 1205  | 412   | 1048  | 514    | 7.31937692 | 1.328780361  | up   | 0.00010818 | 0.010977042 |
| D1792_24740 | MULTISPECIES: succinyl-CoA ligase subunit alpha        | 870  | 10046 | 7375  | 7034  | 2769  | 4156  | 4552   | 9.89439479 | 1.310354602  | up   | 0.00034885 | 0.029497094 |
| D1792_24735 | MULTISPECIES: succinyl-CoA ligase subunit beta         | 1167 | 12880 | 10225 | 9430  | 3694  | 5687  | 5910   | 10.3003364 | 1.304355254  | up   | 0.00026608 | 0.023822054 |
| D1792_16520 | MULTISPECIES: low affinity tryptophan permease         | 1248 | 5921  | 4578  | 4090  | 2308  | 2534  | 2834   | 9.1947696  | 1.154190664  | up   | 0.00056215 | 0.044384306 |
| D1792_08765 | MULTISPECIES: oxalyl-CoA decarboxylase                 | 1695 | 711   | 1482  | 1101  | 2475  | 2477  | 2543   | 8.02890327 | -1.051846518 | down | 2.77E-05   | 0.003413998 |
| D1792_03445 | MULTISPECIES: oxidoreductase                           | 2280 | 1158  | 1748  | 1566  | 3528  | 4205  | 4033   | 8.62060955 | -1.243881867 | down | 2.24E-06   | 0.000364953 |
| D1792_19050 | MULTISPECIES: lysine decarboxylase CadA                | 2148 | 4748  | 4142  | 4009  | 9399  | 12890 | 14551  | 10.2635355 | -1.319515702 | down | 9.92E-05   | 0.010291452 |
| D1792_08770 | formyl-CoA--oxalate CoA-transferase                    | 1251 | 504   | 959   | 523   | 1756  | 1947  | 2142   | 7.57633686 | -1.400970212 | down | 5.73E-07   | 0.000153867 |
| D1792_25640 | MULTISPECIES: formate acetyltransferase 1              | 2283 | 32644 | 23674 | 20925 | 55710 | 85267 | 101691 | 12.9602827 | -1.432041675 | down | 0.00028197 | 0.024759418 |
